# Supplementary material
Source: PubMed Central journal article supplement (PMC9282277)

**Note to readers with disabilities:** *EHP* strives to ensure that all journal content is accessible to all readers. However, some figures and Supplemental Material published in *EHP* articles may not conform to [508 standards](#) due to the complexity of the information being presented. If you need assistance accessing journal content, please contact [ehp508@niehs.nih.gov](mailto:ehp508@niehs.nih.gov). Our staff will work with you to assess and meet your accessibility needs within 3 working days.

### **Supplemental Material**

#### **A Longitudinal Study on the Impact of Indoor Temperature on Heat-Related Symptoms in Older Adults Living in Non-Air-Conditioned Households**

Anaïs Teyton, Mathieu Tremblay, Isabelle Tardif, Marc-André Lemieux, Kareen Nour, and Tarik Benmarhnia

#### **Table of Contents**

**Table S1.** Baseline characteristics of study population (n=277) in Montérégie, Quebec. Percentages and totals are provided for categorical variables.

**Table S2.** Unadjusted and adjusted effect estimates and 95% confidence intervals for each outcome. T1 is the cool temperature period (18°C-22°C), T2 is the warmer temperature period (28°C-30°C), and T3 is the warmest temperature period (30°C-33°C) in Montérégie, Quebec.

**Table S3.** Effect measure modification by pre-existing health conditions for participants living in Montérégie, Quebec. RERI and 95% confidence intervals are included.

**Table S4.** Estimated marginal probabilities used the symptoms presented in Figure 2 for participants living in Montérégie, Quebec.

**Figure S1.** Directed acyclic graph utilized to identify which covariates to condition on to sufficiently close identified backdoor paths.

**Figure S2.** Probability of other symptoms with increasing maximum temperature in Celsius (°C) for participants living in Montérégie, Quebec. The probability point estimate is provided as the point, while the error bars provide the 95% confidence intervals for these probabilities. Models did not converge for the following symptoms: Anxiety, depressive symptoms, headache, loss of consciousness, and nausea.

**Table S1: Baseline characteristics of study population (n=277) in Montérégie, Quebec. Percentages and totals are provided for categorical variables.**

|                                          |              |
|------------------------------------------|--------------|
| <b>Age (SD<sup>a</sup>)</b>              | 72.82 (7.03) |
| <b>Median Age (Min, Max)<sup>b</sup></b> | 73 (60, 95)  |
| <b>Sex</b>                               |              |
| Male                                     | 19.90% (55)  |
| Female                                   | 80.10% (222) |
| <b>Education level</b>                   |              |
| Primary school                           | 23.10% (64)  |
| High School                              | 35% (97)     |
| College, University                      | 41.20% (114) |
| Other                                    | 0.70% (2)    |
| <b>Income<sup>c</sup></b>                |              |
| Insufficient financial resources         | 40.10% (106) |
| Sufficient financial resources           | 59.90% (166) |
| <b>Self-reported Health</b>              |              |
| Reported existing health issues          | 64.50%       |
| Did not report any existing health issue | 35.50%       |
| <b>Employment status</b>                 |              |
| Full time                                | 1.10% (3)    |
| Part time                                | 0.40% (1)    |
| Unemployed                               | 1.10% (3)    |
| Sick leave                               | 0.70% (2)    |
| Retired                                  | 93.50% (259) |
| <b>Living Alone</b>                      |              |
| Yes                                      | 80.90% (224) |
| No                                       | 19.10% (53)  |
| <b>Study Year</b>                        |              |
| 2017                                     | 58.80% (163) |
| 2018                                     | 41.20% (114) |

<sup>a</sup> **SD : Standard Deviation**

<sup>b</sup> **Min : Minimum ; Max : Maximum**

<sup>c</sup> **Income: Refuse/ Do not know (n=5)**

**Table S2: Unadjusted and adjusted effect estimates and 95% confidence intervals for each outcome. T1 is the cool temperature period (18°C-22°C), T2 is the warmer temperature period (28°C-30°C), and T3 is the warmest temperature period (30°C-33°C) in Montréal, Quebec.**

| Outcome                 |        | Unadjusted models <sup>a</sup> |                  |                  | Adjusted models |       |       |
|-------------------------|--------|--------------------------------|------------------|------------------|-----------------|-------|-------|
|                         |        | RR                             | LCI <sup>b</sup> | UCI <sup>b</sup> | RR              | LCI   | UCI   |
| Fatigue                 | Ref:T1 |                                |                  |                  |                 |       |       |
|                         | T2     | 1.828                          | 1.400            | 2.387            | 1.781           | 1.357 | 2.337 |
|                         | T3     | 2.336                          | 1.807            | 3.021            | 2.289           | 1.762 | 2.974 |
| Headache                | Ref:T1 |                                |                  |                  |                 |       |       |
|                         | T2     | 1.083                          | 0.753            | 1.558            | 1.126           | 0.772 | 1.640 |
|                         | T3     | 1.189                          | 0.812            | 1.741            | 1.247           | 0.843 | 1.843 |
| Cramps                  | Ref:T1 |                                |                  |                  |                 |       |       |
|                         | T2     | 1.321                          | 1.022            | 1.708            | 1.290           | 0.995 | 1.673 |
|                         | T3     | 1.399                          | 1.083            | 1.807            | 1.369           | 1.057 | 1.773 |
| Dry mouth               | Ref:T1 |                                |                  |                  |                 |       |       |
|                         | T2     | 2.136                          | 1.501            | 3.040            | 1.999           | 1.397 | 2.860 |
|                         | T3     | 2.546                          | 1.811            | 3.580            | 2.476           | 1.754 | 3.495 |
| Trouble sleeping        | Ref:T1 |                                |                  |                  |                 |       |       |
|                         | T2     | 1.429                          | 1.005            | 2.031            | 1.438           | 1.008 | 2.051 |
|                         | T3     | 2.240                          | 1.602            | 3.132            | 2.240           | 1.591 | 3.151 |
| Lightheadedness         | Ref:T1 |                                |                  |                  |                 |       |       |
|                         | T2     | 1.078                          | 0.739            | 1.572            | 1.008           | 0.684 | 1.485 |
|                         | T3     | 1.408                          | 0.957            | 2.072            | 1.361           | 0.920 | 2.013 |
| Loss of consciousness   | Ref:T1 |                                |                  |                  |                 |       |       |
|                         | T2     | 0.770                          | 0.289            | 2.054            | 0.620           | 0.223 | 1.727 |
|                         | T3     | 1.794                          | 0.786            | 4.091            | 1.784           | 0.782 | 4.068 |
| Nausea                  | Ref:T1 |                                |                  |                  |                 |       |       |
|                         | T2     | 1.284                          | 0.601            | 2.744            | 1.278           | 0.580 | 2.814 |
|                         | T3     | 2.444                          | 1.272            | 4.698            | 2.567           | 1.302 | 5.061 |
| Less frequent urination | Ref:T1 |                                |                  |                  |                 |       |       |
|                         | T2     | 2.430                          | 1.164            | 5.074            | 2.352           | 1.114 | 4.966 |
|                         | T3     | 3.889                          | 1.966            | 7.692            | 3.653           | 1.816 | 7.346 |
| Dark urine              | Ref:T1 |                                |                  |                  |                 |       |       |
|                         | T2     | 2.227                          | 1.400            | 3.542            | 2.236           | 1.392 | 3.591 |

|                     |        |       |       |       |       |       |       |
|---------------------|--------|-------|-------|-------|-------|-------|-------|
|                     | T3     | 1.921 | 1.195 | 3.088 | 1.915 | 1.177 | 3.115 |
| Anxiety             | Ref:T1 |       |       |       |       |       |       |
|                     | T2     | 1.445 | 0.950 | 2.197 | 1.347 | 0.874 | 2.075 |
|                     | T3     | 1.452 | 0.986 | 2.139 | 1.500 | 1.009 | 2.228 |
| Depressive symptoms | Ref:T1 |       |       |       |       |       |       |
|                     | T2     | 1.586 | 1.000 | 2.516 | 1.561 | 0.972 | 2.506 |
|                     | T3     | 1.277 | 0.809 | 2.015 | 1.283 | 0.805 | 2.044 |
| Thirst              | Ref:T1 |       |       |       |       |       |       |
|                     | T2     | 2.019 | 1.486 | 2.743 | 2.001 | 1.469 | 2.725 |
|                     | T3     | 3.440 | 2.588 | 4.573 | 3.389 | 2.544 | 4.515 |

<sup>a</sup> GEE Poisson Models with Robust Variance. Adjusted for Year, Self-rated health, living alone, Gender, Age, Education and Income

<sup>b</sup>LCI: Lower 95% Confidence Interval; UCI: Upper 95% Confidence Interval

**Table S3 - Effect measure modification by pre-existing health conditions for participants living in Montérégie, Quebec. RERI and 95% confidence intervals are included.**

| <b>Self-reported Health Condition</b> | <b>Heat-Related Symptoms</b> | <b>RERI</b> | <b>95% LCI</b> | <b>95% UCI</b> |
|---------------------------------------|------------------------------|-------------|----------------|----------------|
| <b>Diabetes</b>                       |                              |             |                |                |
|                                       | Fatigue                      | 0.709       | 0.014          | 1.403          |
|                                       | Headache                     | -0.503      | -1.375         | 0.370          |
|                                       | Cramps                       | -0.269      | -1.082         | 0.544          |
|                                       | Dry mouth                    | 0.135       | -0.943         | 1.213          |
|                                       | Trouble sleeping             | 0.204       | -0.789         | 1.197          |
|                                       | Lightheadedness              | -0.114      | -1.125         | 0.896          |
|                                       | Nausea                       | -0.070      | -2.486         | 2.346          |
|                                       | Less frequent urination      |             |                |                |
|                                       | Dark urine                   | -0.333      | -1.567         | 0.900          |
|                                       | Anxiety                      | 0.088       | -0.860         | 1.035          |
|                                       | Depressive symptoms          | 0.108       | -0.959         | 1.175          |
|                                       | Thirst                       | -0.667      | -1.756         | 0.422          |
| <b>Cardiovascular Diseases</b>        |                              |             |                |                |
|                                       | Fatigue                      | 0.105       | -0.880         | 1.090          |
|                                       | Headache                     | -0.327      | -1.856         | 1.202          |
|                                       | Cramps                       | 0.286       | -0.435         | 1.007          |
|                                       | Dry mouth                    | 0.328       | -1.223         | 1.878          |
|                                       | Trouble sleeping             | 0.209       | -1.050         | 1.467          |
|                                       | Lightheadedness              | -0.888      | -2.692         | 0.916          |
|                                       | Nausea                       | -1.950      | -5.671         | 1.771          |
|                                       | Less frequent urination      | 1.711       | -1.579         | 5.001          |
|                                       | Dark urine                   | -1.174      | -3.541         | 1.193          |
|                                       | Anxiety                      | -0.864      | -2.451         | 0.722          |
|                                       | Depressive symptoms          | 0.442       | -1.128         | 2.012          |
|                                       | Thirst                       | -0.253      | -1.282         | 0.775          |
| <b>Respiratory Diseases</b>           |                              |             |                |                |
|                                       | Fatigue                      | -0.324      | -1.454         | 0.807          |
|                                       | Headache                     | -0.525      | -1.844         | 0.793          |
|                                       | Cramps                       | -0.023      | -0.903         | 0.857          |
|                                       | Dry mouth                    | 0.208       | -1.418         | 1.834          |
|                                       | Trouble sleeping             | -0.605      | -2.050         | 0.839          |
|                                       | Lightheadedness              | -1.390      | -3.970         | 1.190          |

|                              |                         |        |        |       |
|------------------------------|-------------------------|--------|--------|-------|
|                              | Nausea                  | 1.548  | -1.652 | 4.748 |
|                              | Less frequent urination | 1.045  | -1.994 | 4.084 |
|                              | Dark urine              | -1.503 | -4.081 | 1.076 |
|                              | Anxiety                 | -0.926 | -2.978 | 1.125 |
|                              | Depressive symptoms     | -0.250 | -2.488 | 1.987 |
|                              | Thirst                  | 0.167  | -0.886 | 1.220 |
| <b>Kidney Diseases</b>       |                         |        |        |       |
|                              | Fatigue                 | 0.247  | -0.767 | 1.261 |
|                              | Headache                | -0.389 | -1.952 | 1.173 |
|                              | Cramps                  | 0.325  | -0.452 | 1.101 |
|                              | Dry mouth               | -0.917 | -2.567 | 0.733 |
|                              | Trouble sleeping        | -0.961 | -2.828 | 0.905 |
|                              | Lightheadedness         | -0.739 | -2.218 | 0.739 |
|                              | Nausea                  | -1.761 | -5.513 | 1.990 |
|                              | Less frequent urination | 1.921  | -5.271 | 9.114 |
|                              | Dark urine              | -0.769 | -2.990 | 1.453 |
|                              | Anxiety                 | 0.139  | -1.006 | 1.283 |
|                              | Depressive symptoms     | -0.054 | -2.570 | 2.462 |
|                              | Thirst                  | -0.649 | -2.004 | 0.706 |
| <b>Neurological Diseases</b> |                         |        |        |       |
|                              | Fatigue                 | -1.199 | -2.688 | 0.290 |
|                              | Headache                | -0.163 | -2.056 | 1.731 |
|                              | Cramps                  | 0.071  | -0.915 | 1.058 |
|                              | Dry mouth               | -0.467 | -2.103 | 1.170 |
|                              | Trouble sleeping        | 0.973  | -1.267 | 3.213 |
|                              | Lightheadedness         | -0.608 | -2.645 | 1.428 |
|                              | Nausea                  | -1.153 | -6.004 | 3.697 |
|                              | Less frequent urination |        |        |       |
|                              | Dark urine              | -0.577 | -2.474 | 1.320 |
|                              | Anxiety                 | -2.572 | -5.370 | 0.226 |
|                              | Depressive symptoms     |        |        |       |
|                              | Thirst                  | 0.850  | -0.343 | 2.042 |
| <b>Cancer</b>                |                         |        |        |       |
|                              | Fatigue                 | 0.687  | -0.267 | 1.642 |
|                              | Headache                | 0.036  | -1.596 | 1.667 |
|                              | Cramps                  | 0.186  | -0.863 | 1.234 |

|                            |        |        |       |
|----------------------------|--------|--------|-------|
| Dry mouth                  | -0.609 | -2.310 | 1.093 |
| Trouble sleeping           | 0.638  | -0.922 | 2.198 |
| Lightheadedness            | -0.108 | -1.904 | 1.689 |
| Nausea                     | -0.909 | -3.871 | 2.053 |
| Less frequent<br>urination | 1.437  | -5.770 | 8.643 |
| Dark urine                 | -1.613 | -3.283 | 0.057 |
| Anxiety                    | -1.151 | -2.873 | 0.572 |
| Depressive<br>symptoms     | -1.535 | -3.342 | 0.272 |
| Thirst                     | 0.123  | -1.177 | 1.422 |

\*relative risks due to interaction; LCI: Lower Confidence Interval; UCI: Upper Confidence Interval

**Table S4: Estimated marginal probabilities used the symptoms presented in Figure 2 for participants living in Montérégie, Quebec.**

| <b>Thirst</b>    |                                |                         |       | <b>Trouble Sleeping</b>        |                         |        |       |
|------------------|--------------------------------|-------------------------|-------|--------------------------------|-------------------------|--------|-------|
| Temperature Unit | Estimated Marginal Probability | 95% Confidence Interval |       | Estimated Marginal Probability | 95% Confidence Interval |        |       |
|                  |                                | Lower                   | Upper |                                | Lower                   | Upper  |       |
| 10               | 0.113                          | 0.033                   | 0.193 | 10                             | 0.029                   | -0.002 | 0.060 |
| 11               | 0.120                          | 0.039                   | 0.200 | 11                             | 0.032                   | -0.001 | 0.065 |
| 12               | 0.127                          | 0.047                   | 0.207 | 12                             | 0.036                   | 0.002  | 0.071 |
| 13               | 0.134                          | 0.055                   | 0.214 | 13                             | 0.041                   | 0.004  | 0.077 |
| 14               | 0.142                          | 0.064                   | 0.221 | 14                             | 0.045                   | 0.007  | 0.084 |
| 15               | 0.151                          | 0.073                   | 0.228 | 15                             | 0.051                   | 0.011  | 0.091 |
| 16               | 0.160                          | 0.084                   | 0.236 | 16                             | 0.057                   | 0.016  | 0.098 |
| 17               | 0.169                          | 0.095                   | 0.243 | 17                             | 0.064                   | 0.021  | 0.106 |
| 18               | 0.179                          | 0.108                   | 0.251 | 18                             | 0.071                   | 0.028  | 0.114 |
| 19               | 0.190                          | 0.121                   | 0.259 | 19                             | 0.079                   | 0.035  | 0.123 |
| 20               | 0.201                          | 0.136                   | 0.267 | 20                             | 0.089                   | 0.045  | 0.133 |
| 21               | 0.213                          | 0.151                   | 0.275 | 21                             | 0.099                   | 0.055  | 0.143 |
| 22               | 0.226                          | 0.168                   | 0.284 | 22                             | 0.111                   | 0.068  | 0.154 |
| 23               | 0.239                          | 0.186                   | 0.293 | 23                             | 0.124                   | 0.083  | 0.166 |
| 24               | 0.254                          | 0.205                   | 0.302 | 24                             | 0.139                   | 0.100  | 0.178 |
| 25               | 0.269                          | 0.224                   | 0.313 | 25                             | 0.155                   | 0.119  | 0.192 |
| 26               | 0.285                          | 0.243                   | 0.327 | 26                             | 0.174                   | 0.140  | 0.208 |
| 27               | 0.302                          | 0.260                   | 0.343 | 27                             | 0.194                   | 0.162  | 0.227 |
| 28               | 0.320                          | 0.276                   | 0.364 | 28                             | 0.217                   | 0.184  | 0.251 |
| 29               | 0.339                          | 0.288                   | 0.389 | 29                             | 0.243                   | 0.203  | 0.283 |
| 30               | 0.359                          | 0.298                   | 0.420 | 30                             | 0.272                   | 0.219  | 0.324 |
| 31               | 0.380                          | 0.305                   | 0.455 | 31                             | 0.304                   | 0.233  | 0.375 |
| 32               | 0.403                          | 0.311                   | 0.495 | 32                             | 0.340                   | 0.245  | 0.435 |
| 33               | 0.427                          | 0.315                   | 0.538 | 33                             | 0.380                   | 0.254  | 0.506 |
| 34               | 0.452                          | 0.318                   | 0.586 | 34                             | 0.425                   | 0.262  | 0.589 |
| 35               | 0.479                          | 0.320                   | 0.638 | 35                             | 0.476                   | 0.267  | 0.684 |
| 36               | 0.508                          | 0.320                   | 0.695 | 36                             | 0.532                   | 0.269  | 0.795 |
| 37               | 0.538                          | 0.319                   | 0.757 | 37                             | 0.595                   | 0.267  | 0.923 |



| <b>Dry Mouth</b> |                                      |                            |       | <b>Less Urination</b> |                                      |                            |       |
|------------------|--------------------------------------|----------------------------|-------|-----------------------|--------------------------------------|----------------------------|-------|
|                  | Estimated<br>Marginal<br>Probability | 95% Confidence<br>Interval |       |                       | Estimated<br>Marginal<br>Probability | 95% Confidence<br>Interval |       |
|                  |                                      | Lower                      | Upper |                       |                                      | Lower                      | Upper |
| 10               | 0.045                                | -0.003                     | 0.094 | 10                    | 0.029                                | -0.002                     | 0.060 |
| 11               | 0.049                                | -0.001                     | 0.099 | 11                    | 0.032                                | -0.001                     | 0.065 |
| 12               | 0.053                                | 0.002                      | 0.104 | 12                    | 0.036                                | 0.002                      | 0.071 |
| 13               | 0.058                                | 0.006                      | 0.110 | 13                    | 0.041                                | 0.004                      | 0.077 |
| 14               | 0.063                                | 0.010                      | 0.116 | 14                    | 0.045                                | 0.007                      | 0.084 |
| 15               | 0.068                                | 0.015                      | 0.122 | 15                    | 0.051                                | 0.011                      | 0.091 |
| 16               | 0.074                                | 0.021                      | 0.128 | 16                    | 0.057                                | 0.016                      | 0.098 |
| 17               | 0.081                                | 0.027                      | 0.135 | 17                    | 0.064                                | 0.021                      | 0.106 |
| 18               | 0.088                                | 0.034                      | 0.142 | 18                    | 0.071                                | 0.028                      | 0.114 |
| 19               | 0.096                                | 0.043                      | 0.148 | 19                    | 0.079                                | 0.035                      | 0.123 |
| 20               | 0.104                                | 0.052                      | 0.156 | 20                    | 0.089                                | 0.045                      | 0.133 |
| 21               | 0.113                                | 0.063                      | 0.163 | 21                    | 0.099                                | 0.055                      | 0.143 |
| 22               | 0.123                                | 0.075                      | 0.171 | 22                    | 0.111                                | 0.068                      | 0.154 |
| 23               | 0.133                                | 0.088                      | 0.179 | 23                    | 0.124                                | 0.083                      | 0.166 |
| 24               | 0.145                                | 0.103                      | 0.187 | 24                    | 0.139                                | 0.100                      | 0.178 |
| 25               | 0.158                                | 0.119                      | 0.197 | 25                    | 0.155                                | 0.119                      | 0.192 |
| 26               | 0.171                                | 0.135                      | 0.208 | 26                    | 0.174                                | 0.140                      | 0.208 |
| 27               | 0.186                                | 0.151                      | 0.221 | 27                    | 0.194                                | 0.162                      | 0.227 |
| 28               | 0.202                                | 0.165                      | 0.239 | 28                    | 0.217                                | 0.184                      | 0.251 |
| 29               | 0.220                                | 0.177                      | 0.263 | 29                    | 0.243                                | 0.203                      | 0.283 |
| 30               | 0.239                                | 0.186                      | 0.292 | 30                    | 0.272                                | 0.219                      | 0.324 |
| 31               | 0.260                                | 0.192                      | 0.328 | 31                    | 0.304                                | 0.233                      | 0.375 |
| 32               | 0.282                                | 0.196                      | 0.369 | 32                    | 0.340                                | 0.245                      | 0.435 |
| 33               | 0.307                                | 0.198                      | 0.416 | 33                    | 0.380                                | 0.254                      | 0.506 |
| 34               | 0.333                                | 0.197                      | 0.469 | 34                    | 0.425                                | 0.262                      | 0.589 |
| 35               | 0.362                                | 0.195                      | 0.530 | 35                    | 0.476                                | 0.267                      | 0.684 |
| 36               | 0.394                                | 0.190                      | 0.597 | 36                    | 0.532                                | 0.269                      | 0.795 |
| 37               | 0.428                                | 0.183                      | 0.673 | 37                    | 0.595                                | 0.267                      | 0.923 |

**Figure S1.** Directed acyclic graph utilized to identify which covariates to condition on to sufficiently close identified backdoor paths.

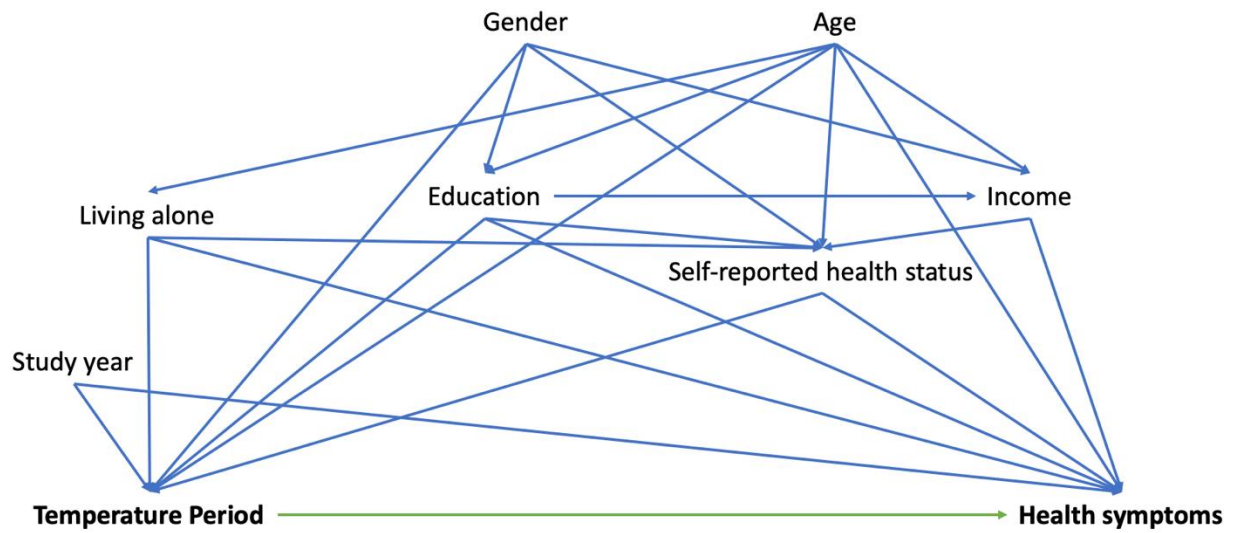

**Figure S2.** Probability of other symptoms with increasing maximum temperature in Celsius (°C) for participants living in Montérégie, Quebec. The probability point estimate is provided as the point, while the error bars provide the 95% confidence intervals for these probabilities. Models did not converge for the following symptoms: Anxiety, depressive symptoms, headache, loss of consciousness, and nausea.

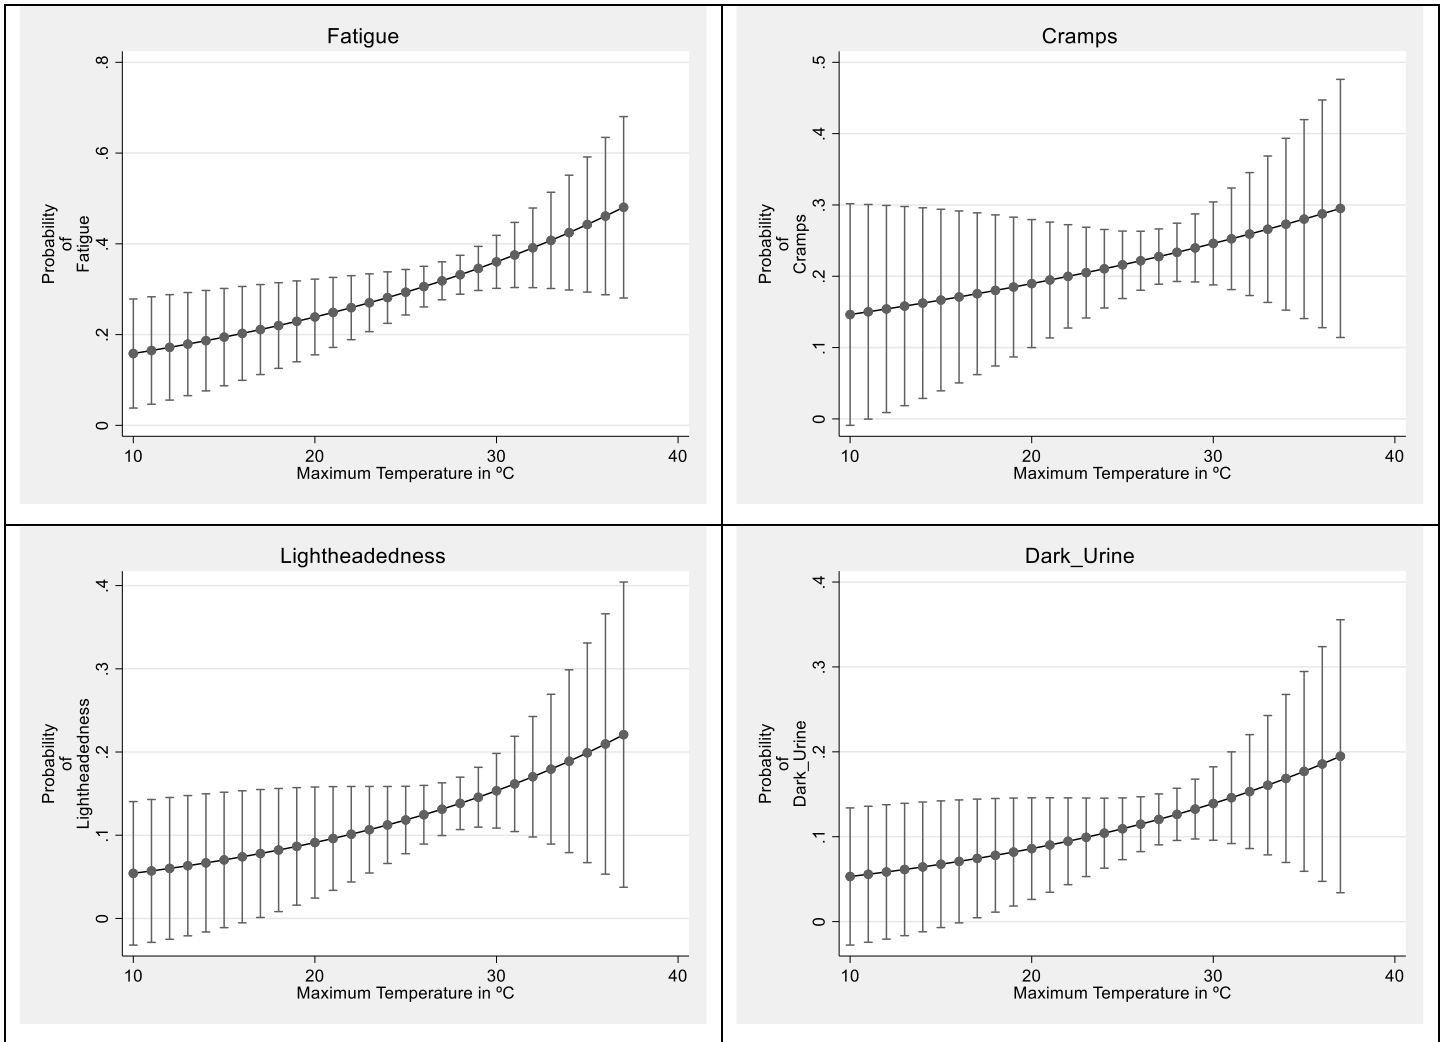

Supplement: ehp10291.s001.acco.pdf [file ehp10291.s001.acco.pdf]
