# Supplementary material
Source: PubMed Central journal article supplement (PMC9282277)
Supplement: ehp10291.smcontents.508.pdf [file ehp10291.smcontents.508.pdf]

**Note to readers with disabilities:** *EHP* strives to ensure that all journal content is accessible to all readers. However, some figures and Supplemental Material published in *EHP* articles may not conform to [508 standards](#) due to the complexity of the information being presented. If you need assistance accessing journal content, please contact [ehp508@niehs.nih.gov](mailto:ehp508@niehs.nih.gov). Our staff will work with you to assess and meet your accessibility needs within 3 working days.

### **Supplemental Material**

#### **A Longitudinal Study on the Impact of Indoor Temperature on Heat-Related Symptoms in Older Adults Living in Non-Air-Conditioned Households**

Anaïs Teyton, Mathieu Tremblay, Isabelle Tardif, Marc-André Lemieux, Kareen Nour, and Tarik Benmarhnia

#### **Table of Contents**

**Table S1.** Baseline characteristics of study population (n=277) in Montérégie, Quebec. Percentages and totals are provided for categorical variables.

**Table S2.** Unadjusted and adjusted effect estimates and 95% confidence intervals for each outcome. T1 is the cool temperature period (18°C-22°C), T2 is the warmer temperature period (28°C-30°C), and T3 is the warmest temperature period (30°C-33°C) in Montérégie, Quebec.

**Table S3.** Effect measure modification by pre-existing health conditions for participants living in Montérégie, Quebec. RERI and 95% confidence intervals are included.

**Table S4.** Estimated marginal probabilities used the symptoms presented in Figure 2 for participants living in Montérégie, Quebec.

**Figure S1.** Directed acyclic graph utilized to identify which covariates to condition on to sufficiently close identified backdoor paths.

**Figure S2.** Probability of other symptoms with increasing maximum temperature in Celsius (°C) for participants living in Montérégie, Quebec. The probability point estimate is provided as the point, while the error bars provide the 95% confidence intervals for these probabilities. Models did not converge for the following symptoms: Anxiety, depressive symptoms, headache, loss of consciousness, and nausea.
